# Supplementary material
Source: PubMed Central journal article supplement (PMC2746469)
Supplement: blood-2009-03-211797_1.pdf [file blood-2009-03-211797_1.pdf]

| <b>physician's last name</b> | <b>physician's first name</b> | <b>physician's middle name</b> | <b>institution</b>                                                   | <b>city</b>  | <b>state</b> |
|------------------------------|-------------------------------|--------------------------------|----------------------------------------------------------------------|--------------|--------------|
| ABBOUD                       | CAMILLE                       |                                | Rochester, University of                                             | Rochester    | NY           |
| Amatruda                     | Thomas                        | T.                             | Unity Hospital                                                       | Fridley      | MN           |
| Ardman                       | Blair                         |                                | Saints Memorial Medical Center                                       | Lowell       | MA           |
| BALABAN                      | EDWARD                        |                                | Sewickley Valley Hospital                                            | Sewickley    | PA           |
| BROWN                        | ARCHIE                        |                                | Ochsner Clinic                                                       | New Orleans  | LA           |
| Blank                        | Jules                         | H.                             | St Vincent Hosp Reg Cancer Ctr<br>CCOP                               | Green Bay    | WI           |
| Bloom                        | Stuart                        |                                | North Memorial Medical Center                                        | Minneapolis  | MN           |
| Bottner                      | Wayne                         | A.                             | Gundersen Lutheran                                                   | La Crosse    | WI           |
| Brady                        | James                         | O'Herron                       | Geisinger Medical Ctr                                                | Danville     | PA           |
| CLAUSEN                      | DIANE                         |                                | Stony Brook University Hospital                                      | Stony Brook  | NY           |
| COLARUSSO                    | PATRICK                       |                                | Pottstown Memorial Medical Center                                    | Pottstown    | PA           |
| COLE                         | JOHN                          |                                | Ochsner Clinic                                                       | New Orleans  | LA           |
| COPPER                       | MAUREEN                       |                                | Clarian Health-Methodist Hospital                                    | Indianapolis | IN           |
| Clouse                       | Lawrence                      | Henry                          | Marshfield Clinic                                                    | Marshfield   | WI           |
| Cole                         | John                          | Thomas                         | Ochsner Clinic                                                       | New Orleans  | LA           |
| DALFEN                       | RICHARD                       |                                | Bristol Hospital                                                     | Bristol      | CT           |
| DELGALVIS                    | SUSAN                         |                                | Geisinger Medical Ctr                                                | Danville     | PA           |
| DHAMI                        | MANDEEP                       |                                | Eastern CT Hem & Onc Associates                                      | Norwich      | CT           |
| DOBBS                        | TRACY                         |                                | Baptist Hospital of East Tennessee                                   | Knoxville    | TN           |
| DUGAN                        | WILLIAM                       |                                | Clarian Health-Methodist Hospital                                    | Indianapolis | IN           |
| EGNER                        | JAMES                         |                                | Carle Clinic Association                                             |              |              |
| EINHORN                      | HARVEY                        |                                | SwedishAmerican Hosp                                                 | Rockford     | IL           |
| EISENBERG                    | ANDREW                        |                                | St Joseph Mercy Hosp - Ann Arbor                                     |              |              |
| ERBAN                        | JOHN                          |                                | Tufts Medical Center                                                 | Boston       | MA           |
| Egner                        | James                         | R.                             | Carle Clinic Association                                             |              |              |
| FERRI                        | WILLIAM                       |                                | Onc/Hem Assoc - Beaver, PA<br>Dean Hematology and Oncology<br>Clinic | Beaver       | PA           |
| FRONTIERA                    | MICHAEL                       |                                |                                                                      | Madison      | WI           |
| Foss                         | Francine                      | Marie                          | Tufts Medical Center<br>Dean Hematology and Oncology<br>Clinic       | Boston       | MA           |
| Frontiera                    | Michael                       | S.                             |                                                                      | Madison      | WI           |
| GHOSH                        | CHIRANTAN                     |                                | Cedar Rapids Oncology Associates                                     |              |              |
| GORE                         | STEVEN                        |                                | Johns Hopkins University                                             | Baltimore    | MD           |
| GORTON                       | STEVEN                        |                                | St John's Hospital                                                   | Longview     | WA           |
| GOYAL                        | VIJAY                         |                                | St Anthony Med Ctr                                                   | Rockford     | IL           |
| GROSS                        | GERALD                        |                                | MeritCare Hospital CCOP                                              | Fargo        | ND           |

| physician's last name | physician's first name | physician's middle name | institution                        | city           | state |
|-----------------------|------------------------|-------------------------|------------------------------------|----------------|-------|
| Geeraerts             | Louis                  | H.                      | MeritCare Hospital CCOP            | Fargo          | ND    |
| Gerad                 | Henry                  |                         | St Rita's Med Center               | Lima           | OH    |
| Gore                  | Steven                 | D.                      | Johns Hopkins University           | Baltimore      | MD    |
| HEIM                  | WILLIAM                |                         | Mercy Hospital - Scranton          | Scranton       | PA    |
| Houston               | Jessie                 | G.                      | Carle Clinic Association           |                |       |
| Howe                  | Craig                  | W.                      | Unity Hospital                     | Fridley        | MN    |
| Ifthikharuddin        | Jainulabdeen           | Jalaluddin              | Rochester, University of           | Rochester      | NY    |
| Islam                 | Rezwan                 |                         | Marshfield Clinic                  | Marshfield     | WI    |
| JAGATHABAL            | KANDHASAMY             |                         | Eastern CT Hem & Onc Associates    | Norwich        | CT    |
| Jones                 | Jacqueline             | J.                      | Licking Memorial Hospital          | Newark         | OH    |
| KAHANIC               | STEPHEN                |                         | Siouxland Hem-Onc Assoc            | Sioux City     | IA    |
| KAMINER               | LYNNE                  |                         | NorthShore University HealthSystem | Evanston       | IL    |
| KLEIN                 | LEONARD                |                         | Holy Family Medical Center         | Des Plaines    | IL    |
| LARRIMER              | NYE                    |                         | Mount Carmel Health System         | Columbus       | OH    |
| LAUFMAN               | LESLIE                 |                         | Grady Memorial Hospital            | Delaware       | OH    |
| LORD                  | RAYMOND                |                         | West Michigan Cancer Center        | Kalamazoo      | MI    |
| Larson                | Timothy                | G.                      | North Memorial Medical Center      | Minneapolis    | MN    |
| Lord                  | Raymond                | Sterling                | West Michigan Cancer Center        | Kalamazoo      | MI    |
| MAKARY                | ADEL                   |                         | Geisinger Medical Ctr              | Danville       | PA    |
| MANUSZAK              | PAUL                   |                         | Aultman Hospital                   | Canton         | OH    |
| MCLAUGHLIN            | MICHAEL                |                         | Exempla Saint Joseph Hospital      | Denver         | CO    |
| MILLER                | KENNETH                |                         | Tufts Medical Center               | Boston         | MA    |
| MINTZER               | DAVID                  |                         | Pennsylvania Hospital              | Philadelphia   | PA    |
| Madej                 | Patricia               | Joan                    | Hinsdale Hospital                  | Hinsdale       | IL    |
| Mazza                 | Joseph                 | J.                      | Marshfield Clinic                  | Marshfield     | WI    |
| Miller                | Kenneth                | B.                      | Tufts Medical Center               | Boston         | MA    |
| Nagle                 | Lawrence               | S.                      | Erlanger Medical Center            | Chattanooga    | TN    |
| Nwaneri               | Matthew                | Obinna                  | Abbott Northwestern Hospital       | Minneapolis    | MN    |
| OZA                   | RAJEN                  |                         | Warren Hospital - NJ               | Phillipsburg   | NJ    |
| PICKENS               | PETER                  |                         | Abington Memorial Hospital         | Abington       | PA    |
| RICHTER               | HAROLD                 |                         | Boca Raton Community Hospital      | Boca Raton     | FL    |
| ROUSEY                | STEVEN                 |                         | Fairview-Southdale Hospital        | St. Louis Park | MN    |
| ROWLAND               | KENDRITH               |                         | Carle Clinic Association           |                |       |
| Rousey                | Steven                 | Ross                    | Fairview-Southdale Hospital        | St. Louis Park | MN    |
| Rowland               | Kendrith               | M.                      | Carle Clinic Association           |                |       |

| <b>physician's last name</b> | <b>physician's first name</b> | <b>physician's middle name</b> | <b>institution</b>                 | <b>city</b>     | <b>state</b> |
|------------------------------|-------------------------------|--------------------------------|------------------------------------|-----------------|--------------|
| SCHENKEIN                    | DAVID                         |                                | Tufts Medical Center               | Boston          | MA           |
| SHAH                         | ROHIT                         |                                | Lake Forest Hospital               | Lake Forest     | IL           |
| SLATER                       | DENNIS                        |                                | Eastern CT Hem & Onc Associates    | Norwich         | CT           |
| SUBRAMANIAN                  | SESHAN                        |                                | Mercy Hospital                     | Chicago         | IL           |
| Schneider                    | Daniel                        | J.                             | Regions Hospital                   | St. Paul        | MN           |
| Siemers                      | Ross                          | F.                             | North Memorial Medical Center      | Minneapolis     | MN           |
| Srinivas                     | Shanti                        |                                | VA New Jersey Health Care System   | East Orange     | NJ           |
| Stella                       | Philip                        | J.                             | St Joseph Mercy Hosp - Ann Arbor   |                 |              |
| TRAYNOR                      | ANN                           |                                | VA Medical Center - Lakeside       | Chicago         | IL           |
| TSCHETTER                    | LOREN                         |                                | Sanford Cancer Ctr-Oncology Clinic | Sioux Falls     | SD           |
| Tallman                      | Martin                        | S.                             | Northwestern University            | Chicago         | IL           |
| Topolsky                     | David                         | Lane                           | Drexel Univ College of Medicine    | Philadelphia    | PA           |
| Trevarthen                   | David                         | R.                             | Swedish Medical Center             | Englewood       | CO           |
| Tschetter                    | Loren                         | K.                             | Sanford Cancer Ctr-Oncology Clinic | Sioux Falls     | SD           |
| VANDERJAGT                   | RICHARD                       |                                | Ottawa Hospital General Site       | Ottawa, Ontario | CANADA       |
| Vesole                       | David                         | H.                             | Medical College of Wisconsin       | Milwaukee       | WI           |
| WASSER                       | JEFFREY                       |                                | Manchester Memorial Hospital       | Manchester      | CT           |
| WINSTON                      | ROBERT                        |                                | Mercy Hospital                     | Coon Rapids     | MN           |
| Weiss                        | Matthias                      |                                | Marshfield Clinic                  | Marshfield      | WI           |
| Yirinec                      | Bruce                         | Allen                          | Clifton Springs Hospital & Clinic  | Clifton Springs | NY           |
